# Supplementary material for: Solution plasma assisted Mn-doping: a novel strategy for developing highly durable and active oxygen evolution catalysts
Source: Royal Society of Chemistry journal article supplement (doi:10.1039/d3se01398g), 2024-01-01
Supplement: d3se01398g1.pdf [file d3se01398g1.pdf]

# **Solution plasma assisted Mn-doping: A novel strategy for developing highly durable and active oxygen evolution catalysts**

Hao He<sup>a</sup>, Takeshi Matsuda<sup>a</sup>, Akira Miura<sup>b</sup>, Masanori Nagao<sup>c</sup>, Jeevan Kumar Padarti<sup>a</sup>,  
Tomoya Ohno<sup>a</sup>, and Shigeto Hirai<sup>\*a</sup>

<sup>a</sup> School of Earth, Energy and Environmental Engineering, Kitami Institute of Technology, 165 Koen-cho, Kitami 090-8507, Japan.

<sup>b</sup> Faculty of Engineering, Hokkaido University, Sapporo, Hokkaido, 060-8628, Japan.

<sup>c</sup> University of Yamanashi, 7-32 Miyamae, Kofu, Yamanashi 400-0021, Japan.

\* Corresponding author: e-mail [hirai@mail.kitami-it.ac.jp](mailto:hirai@mail.kitami-it.ac.jp)

## Supporting Information

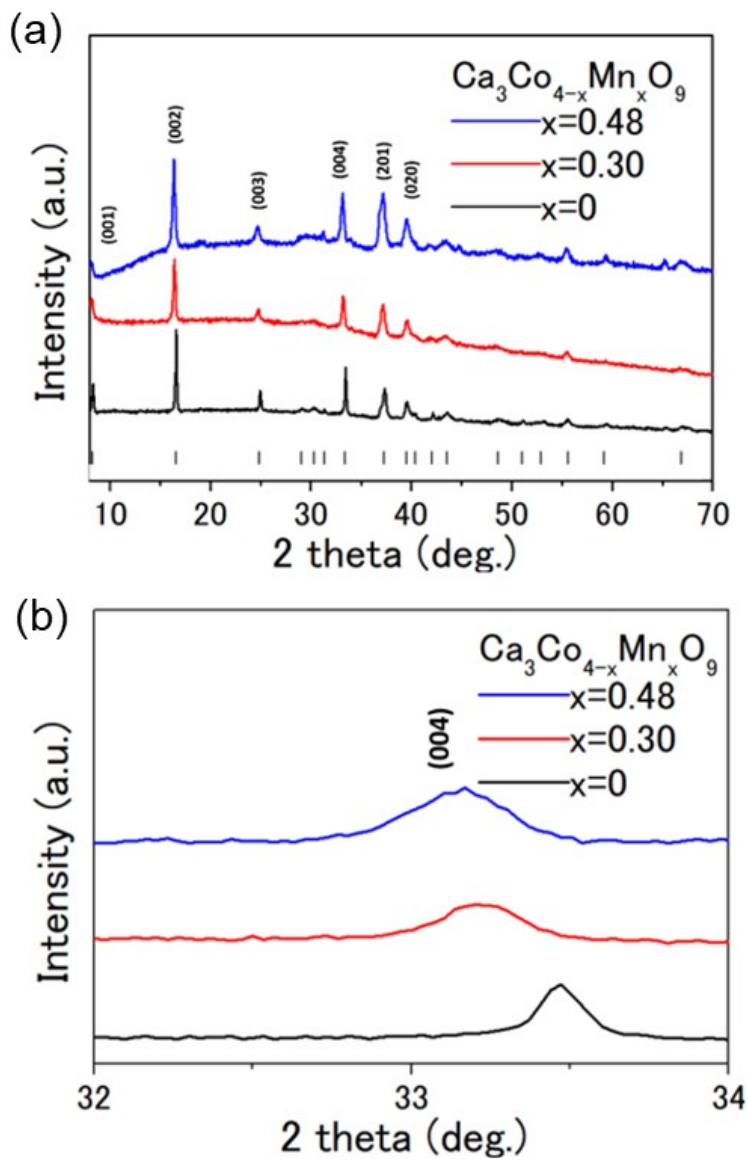

**Fig. S1.** (a) X-ray diffraction profiles of  $\text{Ca}_3\text{Co}_{4-x}\text{Mn}_x\text{O}_9$  ( $x=0,0.30,0.48$ ) along with the Bragg position of  $\text{Ca}_3\text{Co}_4\text{O}_9$ . (b) Expanded view of the (0 0 4) peak for  $\text{Ca}_3\text{Co}_{4-x}\text{Mn}_x\text{O}_9$ .

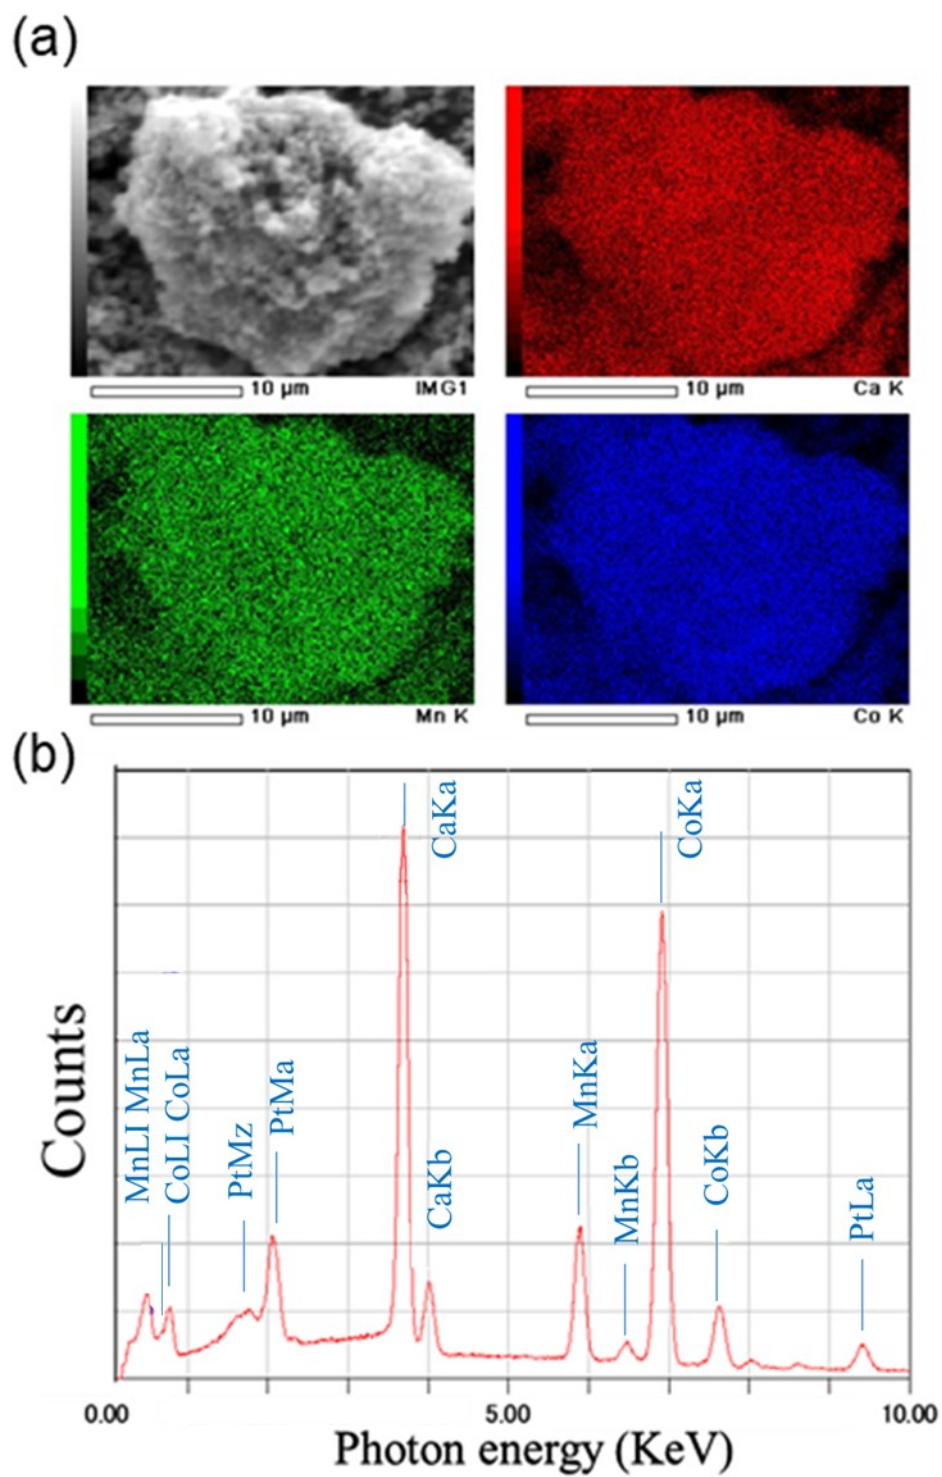

**Fig. S2.** SEM image of  $\text{Ca}_3\text{Co}_{4-x}\text{Mn}_x\text{O}_9$ . The representative SEM image, EDX elemental mapping, and EDX spectrum of  $\text{Ca}_3\text{Co}_{4-x}\text{Mn}_x\text{O}_9$  ( $x=0.48$ ).

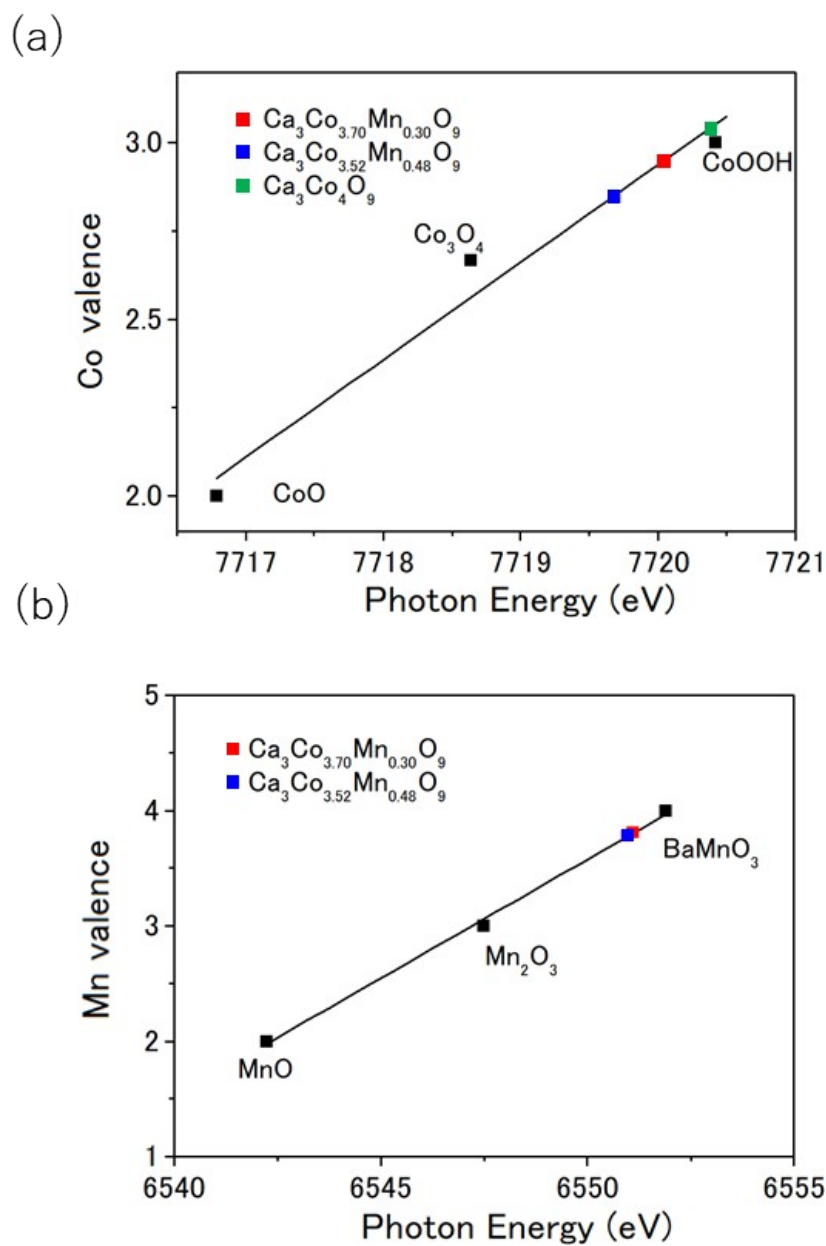

**Fig. S3.** Co and Mn K-edge X-ray absorption near-edge structure (XANES) spectra for  $\text{Ca}_3\text{Co}_{4-x}\text{Mn}_x\text{O}_9$  ( $x=0, 0.30, 0.48$ ). (a) Co valence of pristine  $\text{Ca}_3\text{Co}_{4-x}\text{Mn}_x\text{O}_9$  ( $x=0, 0.30, 0.48$ ),  $\text{CoO}$ ,  $\text{Co}_3\text{O}_4$ , and  $\text{CoOOH}$  as a function of the photon energy for the Co K-edge peak. Therefore, the average Co valence is between 2.67 and 3. (b) Mn valence of pristine  $\text{Ca}_3\text{Co}_{4-x}\text{Mn}_x\text{O}_9$  ( $x=0, 0.30, 0.48$ ),  $\text{MnO}$ ,  $\text{Mn}_2\text{O}_3$ , and  $\text{BaMnO}_3$  as a function of the photon energy for the Mn K-edge peak. Therefore, the average Mn valence is between 3 and 4.

(a)

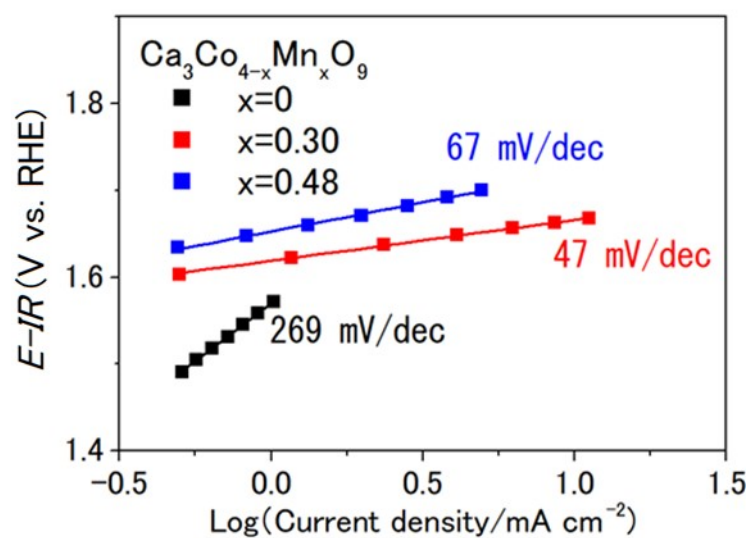

(b)

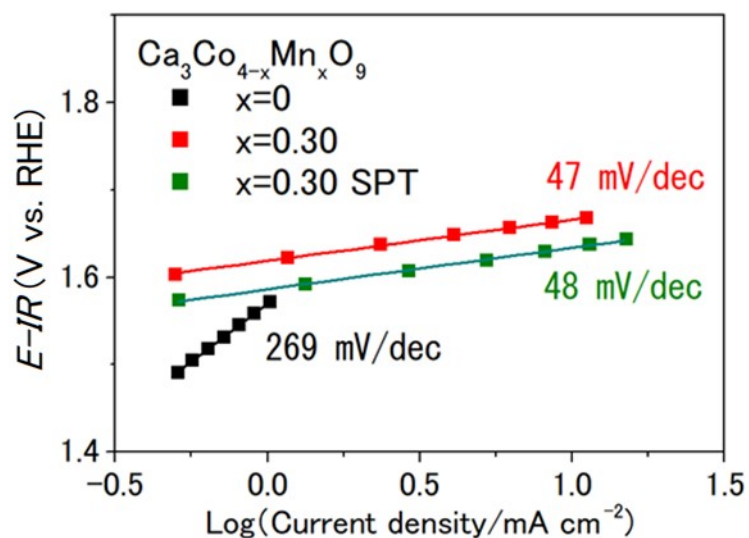

**Fig. S4.** Tafel plots of  $\text{Ca}_3\text{Co}_{4-x}\text{Mn}_x\text{O}_9$ . (a) Tafel plots for  $\text{Ca}_3\text{Co}_4\text{O}_9$ ,  $\text{Ca}_3\text{Co}_{3.70}\text{Mn}_{0.30}\text{O}_9$ , and  $\text{Ca}_3\text{Co}_{3.52}\text{Mn}_{0.48}\text{O}_9$ . (b) Tafel plots for  $\text{Ca}_3\text{Co}_4\text{O}_9$ ,  $\text{Ca}_3\text{Co}_{3.70}\text{Mn}_{0.30}\text{O}_9$ , and  $\text{Ca}_3\text{Co}_{3.70}\text{Mn}_{0.30}\text{O}_9$  after the solution plasma treatment.

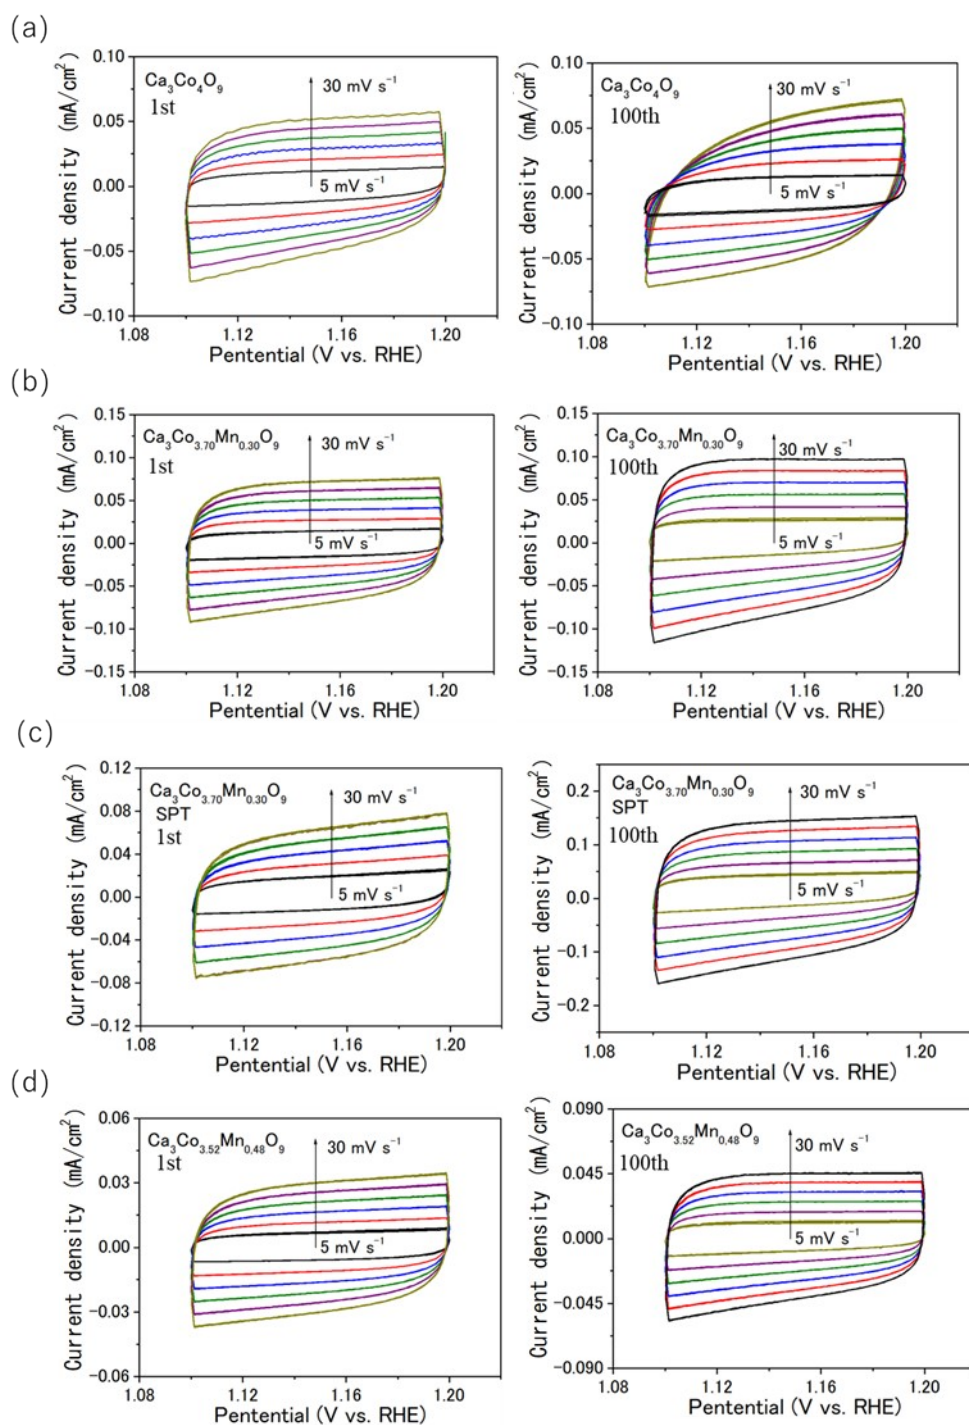

**Fig. S5.** Calculation of the double layer capacitance for  $\text{Ca}_3\text{Co}_{4-x}\text{Mn}_x\text{O}_9$  ( $x=0, 0.30, 0.48, 0.30$  SPT) at the 1st and 100th OER cycle. The cyclic voltammograms measured from 0.174–0.274 V vs. Hg/HgO in 0.1 M KOH aqueous solution at the scan rate of 10 mV/s.



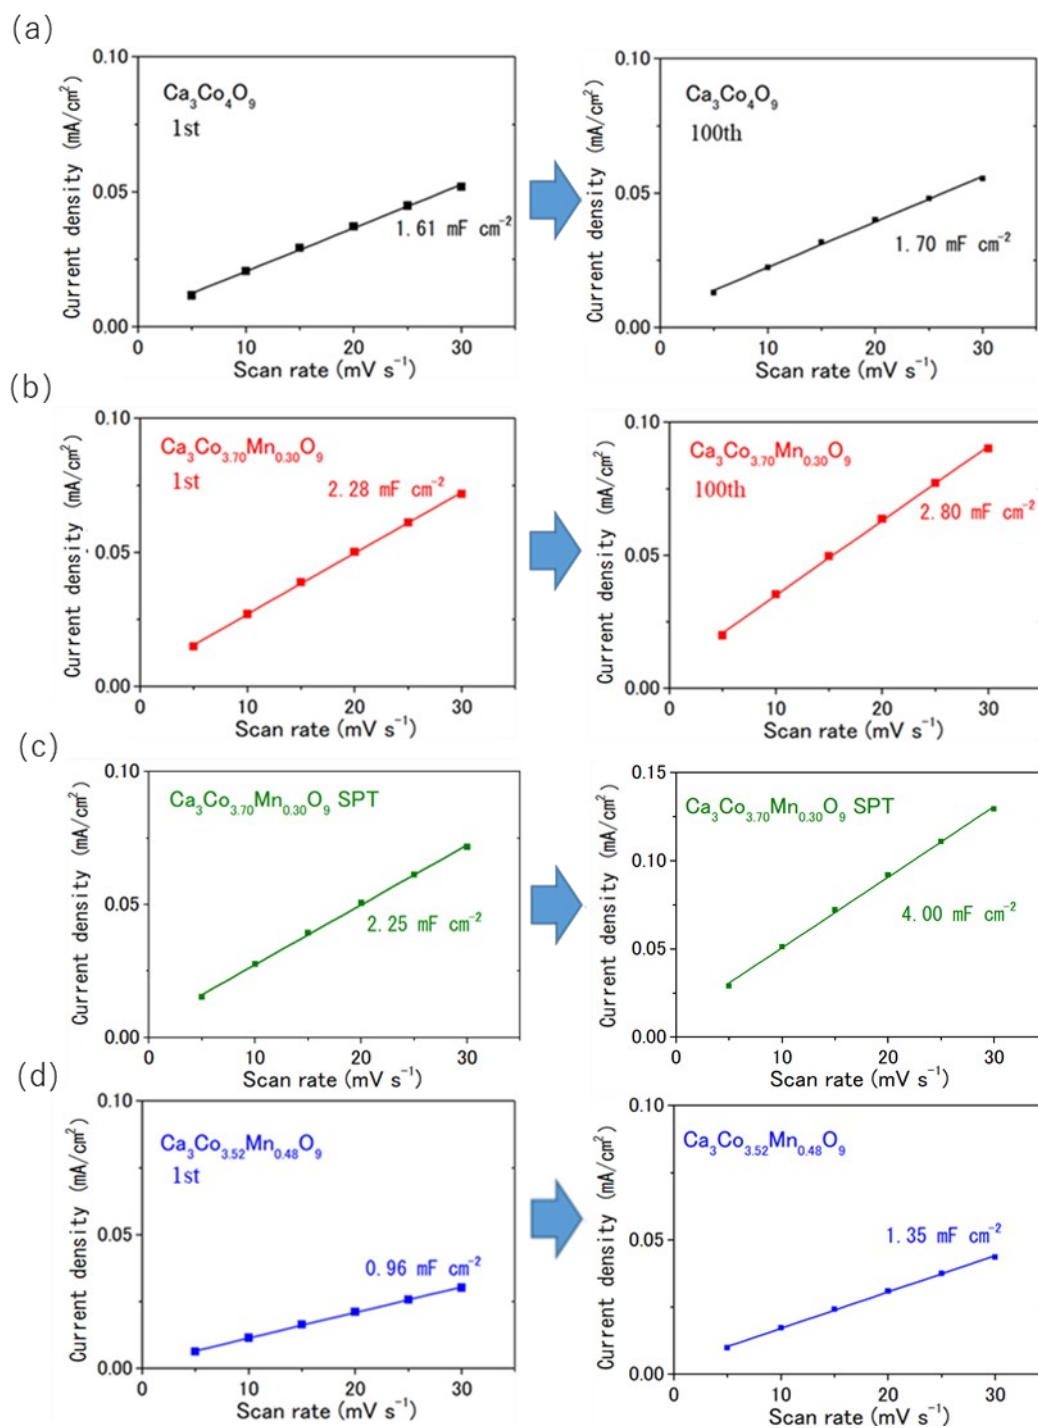

**Fig. S6.** The scan rate dependence of the current density at 1.15 V vs. RHE in 0.1 M KOH aqueous solution at the scan rate of 10 mV/s for  $\text{Ca}_3\text{Co}_{4-x}\text{Mn}_x\text{O}_9$  ( $x=0, 0.30, 0.48, 0.30$  SPT) at the 1st and 100th OER cycle.

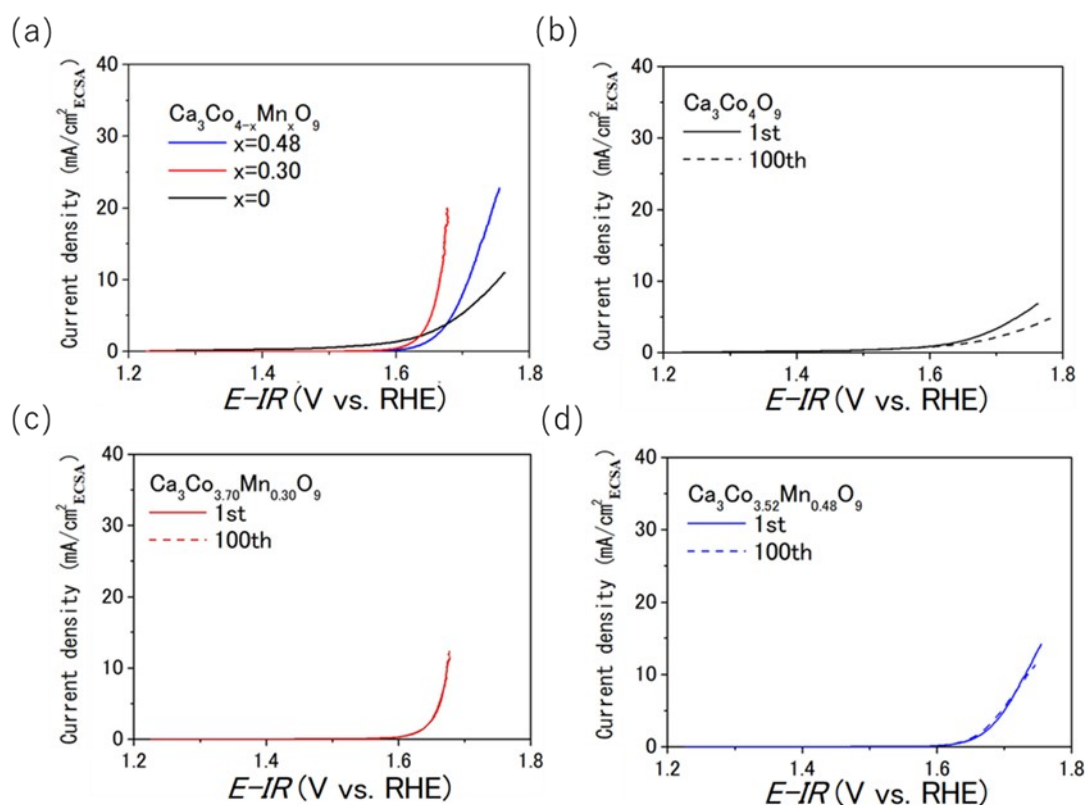

**Fig. S7.** The OER activity of  $\text{Ca}_3\text{Co}_{4-x}\text{Mn}_x\text{O}_9$  ( $x=0, 0.30, 0.48$ ). (a) The linear sweep voltammograms for  $\text{Ca}_3\text{Co}_{4-x}\text{Mn}_x\text{O}_9$  ( $x=0, 0.30, 0.48$ ) in 0.1 M KOH aqueous solution normalized to the relative ECSA determined from the slope of Fig. S6. Linear sweep voltammograms at the 1st and 100th cycle for (b)  $\text{Ca}_3\text{Co}_4\text{O}_9$ , (c)  $\text{Ca}_3\text{Co}_{4-x}\text{Mn}_x\text{O}_9$  ( $x=0.30$ ), and (d)  $\text{Ca}_3\text{Co}_{4-x}\text{Mn}_x\text{O}_9$  ( $x=0.48$ ) in 0.1 M KOH aqueous solution normalized to the relative ECSA determined from the slope of Fig. S6.



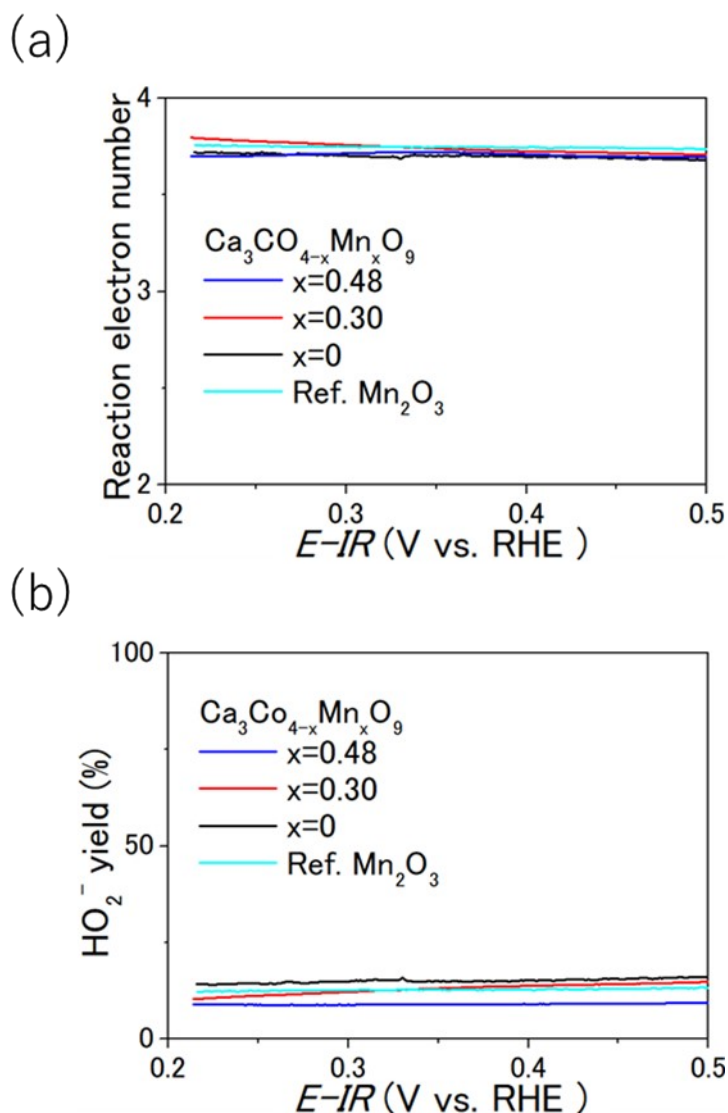

**Fig. S8.** (a) The reaction electron number of the ORR for  $\text{Ca}_3\text{Co}_{4-x}\text{Mn}_x\text{O}_9$  ( $x=0, 0.30, 0.48$ ) in 0.1 M KOH aqueous solution at the scan rate of 10 mV/s.  $\text{Mn}_2\text{O}_3$  nanoparticle is shown as a standard of a highly active ORR catalyst. The reaction electron numbers

(ne) were calculated using  $\frac{4NI_d}{NI_d + I_r}$ , where  $I_d$  is the disk current density,  $I_r$  is the ring current density, and  $N$  ( $=0.42$ ) is the current collection efficiency. (b) The hydrogen peroxide yield of the ORR for  $\text{Ca}_3\text{Co}_{4-x}\text{Mn}_x\text{O}_9$  ( $x=0, 0.30, 0.48$ ) before and after the solution plasma treatment measured in 0.1 M KOH aqueous solution at the scan rate of

10 mV/s. The hydrogen peroxide yield was calculated using  $\text{HO}_2^-$  (%) =  $\frac{200I_r}{NI_d + I_r}$ .

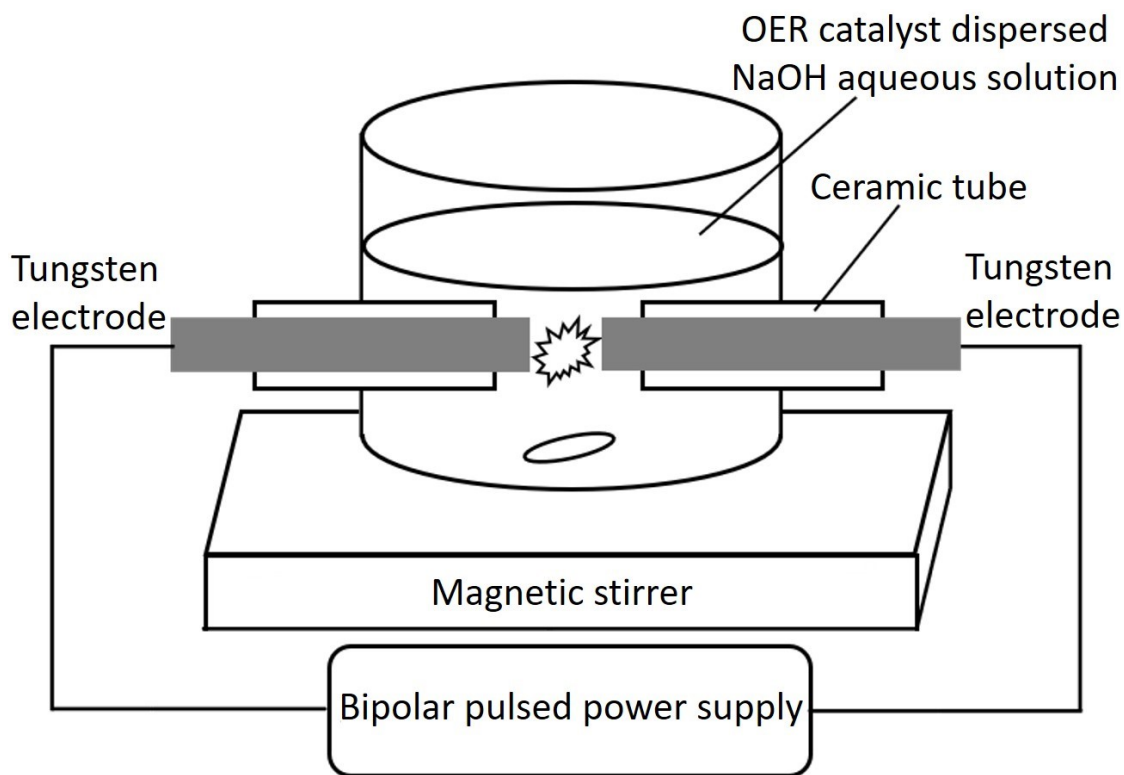

**Fig. S9.** Schematic image of the system used for the solution plasma treatment of the OER catalyst. In the present study, the solution plasma treatment of  $\text{Ca}_3\text{Co}_{4-x}\text{Mn}_x\text{O}_9$  ( $x=0.30$ ) was conducted in 0.01 M NaOH aqueous solution.

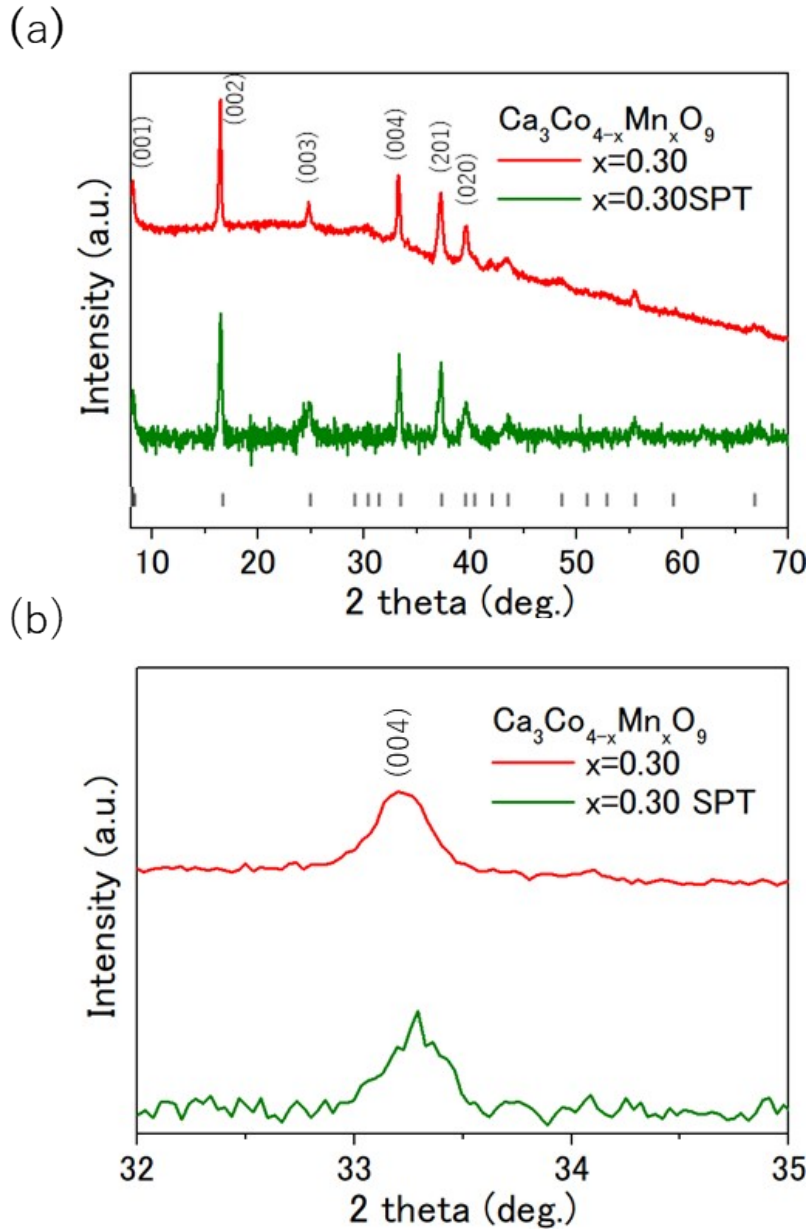

**Fig. S10.** (a) X-ray diffraction profiles and (b) the expanded view of the (0 0 4) peak for  $\text{Ca}_3\text{Co}_{4-x}\text{Mn}_x\text{O}_9$  ( $x=0.3$ ) before and after the solution plasma treatment.  $\text{Ca}_3\text{Co}_{4-x}\text{Mn}_x\text{O}_9$  after the solution plasma treatment is denoted as SPT.

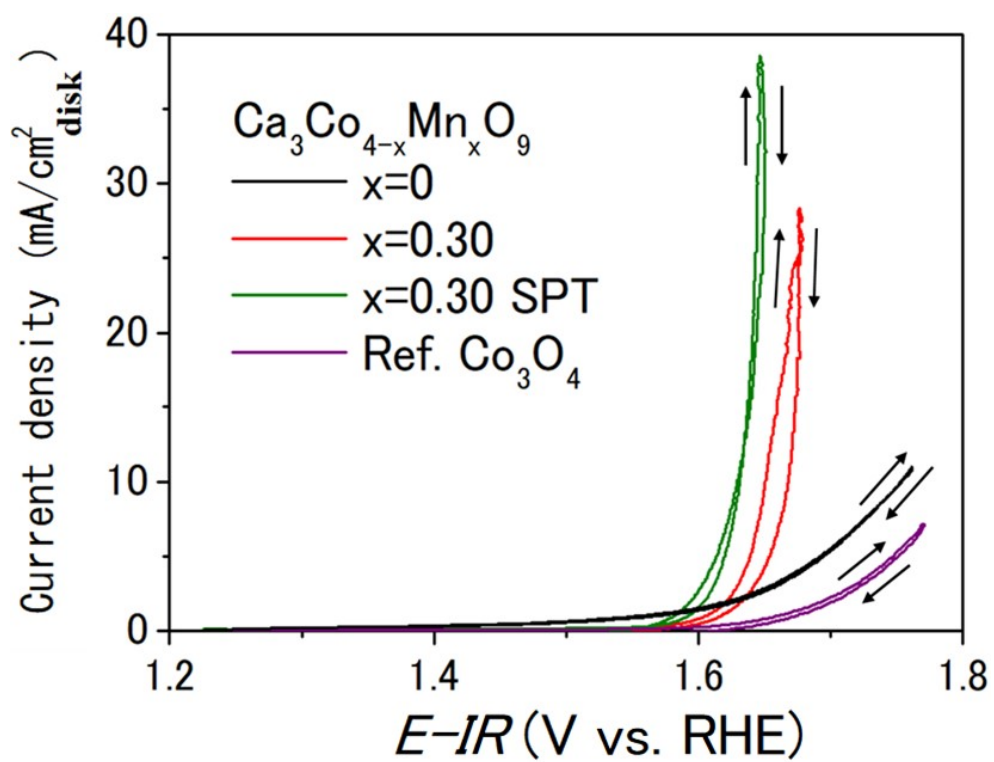

**Fig. S11.** The cyclic voltammograms of  $\text{Ca}_3\text{Co}_{4-x}\text{Mn}_x\text{O}_9$  ( $x=0,0.30,0.30$  SPT) for OER in 0.1 M KOH aqueous solution normalized to the disk electrode area.  $\text{Ca}_3\text{Co}_{4-x}\text{Mn}_x\text{O}_9$  after the solution plasma treatment is denoted as SPT.

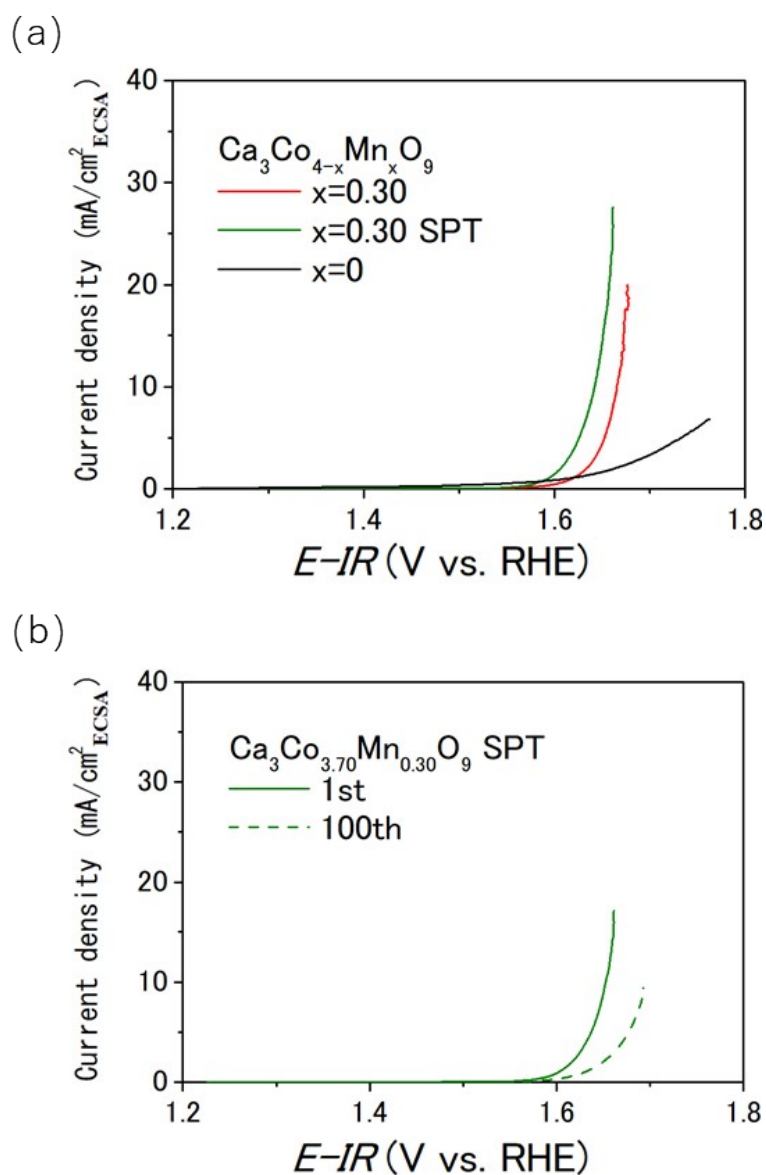

**Fig. S12.** (a) Linear sweep voltammograms of  $\text{Ca}_3\text{Co}_{4-x}\text{Mn}_x\text{O}_9$  ( $x=0,0.30,0.30$  SPT) for OER in 0.1 M KOH aqueous solution normalized to the relative ECSA determined from the slope of Fig. S6. (b) Linear sweep voltammograms of the 1st and 100th cycle for  $\text{Ca}_3\text{Co}_{3.70}\text{Mn}_{0.30}\text{O}_9$  in 0.1 M KOH aqueous solution normalized to the relative ECSA determined from the slope of Fig. S6.

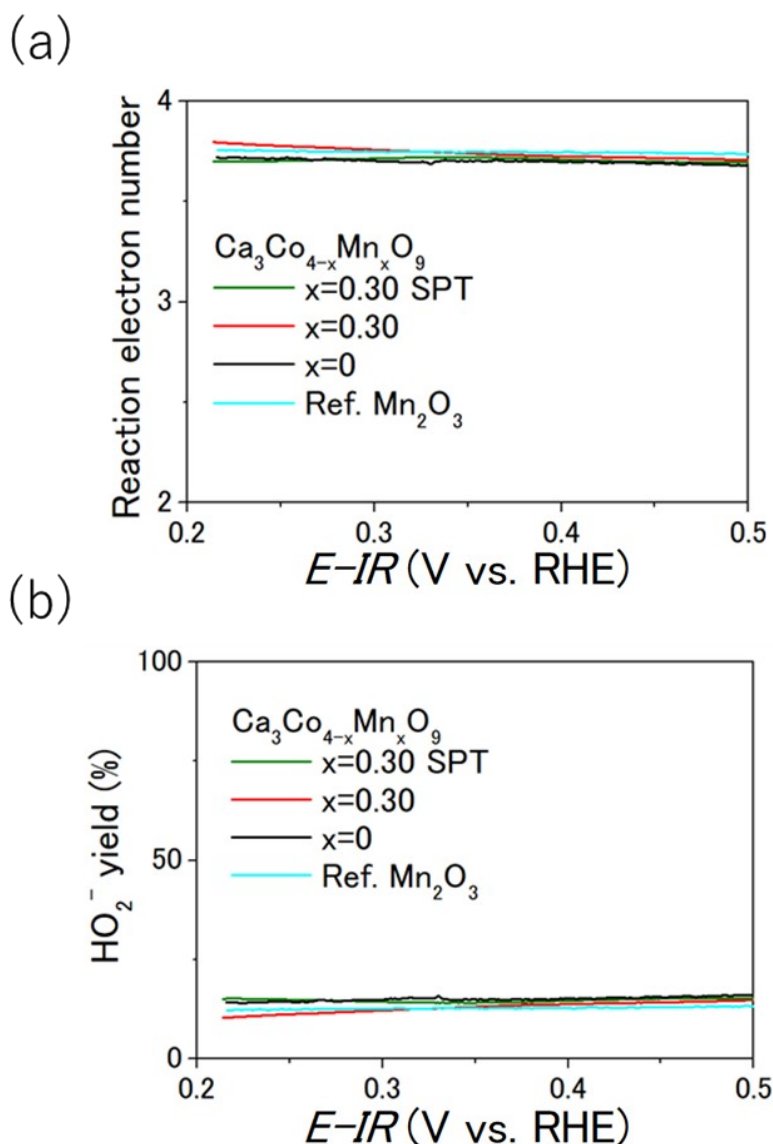

**Fig. S13.** (a) The reaction electron number of the ORR for  $\text{Ca}_3\text{Co}_{4-x}\text{Mn}_x\text{O}_9$  ( $x=0.3$ ) before and after the solution plasma treatment measured in 0.1 M KOH aqueous solution.  $\text{Mn}_2\text{O}_3$  nanoparticle is shown as a standard of a highly active ORR catalyst. The reaction electron

numbers (ne) were calculated using  $\frac{4NI_d}{NI_d + I_r}$ , where  $I_d$  is the disk current density,  $I_r$  is the ring current density, and  $N$  ( $=0.42$ ) is the current collection efficiency. (b) The hydrogen peroxide yield of the ORR for  $\text{Ca}_3\text{Co}_{4-x}\text{Mn}_x\text{O}_9$  ( $x=0.3$ ) before and after the solution plasma treatment measured in 0.1 M KOH aqueous solution. The hydrogen peroxide yield for  $\text{Ca}_3\text{Co}_4\text{O}_9$  is shown as a reference. The hydrogen peroxide yield was calculated using

$$\text{HO}_2^- (\%) = \frac{200I_r}{NI_d + I_r}$$

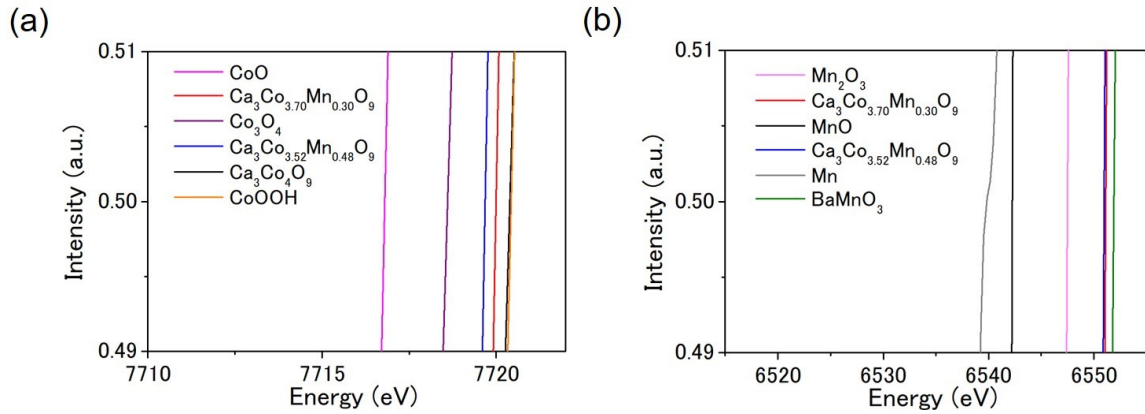

**Fig. S14.** (a) Expanded view of the Co K-edge X-ray absorption near-edge structure (XANES) spectra for  $\text{Ca}_3\text{Co}_{4-x}\text{Mn}_x\text{O}_9$  ( $x=0, 0.30, 0.48$ ). Co K-edge XANES spectra of CoO,  $\text{Co}_3\text{O}_4$ , and CoOOH were collected as standard materials. (b) Expanded view of the Mn K-edge X-ray absorption near-edge structure (XANES) spectra for  $\text{Ca}_3\text{Co}_{4-x}\text{Mn}_x\text{O}_9$  ( $x=0, 0.30, 0.48$ ). Mn K-edge XANES spectra of MnO,  $\text{Mn}_2\text{O}_3$ , and  $\text{BaMnO}_3$  were collected as standard materials.

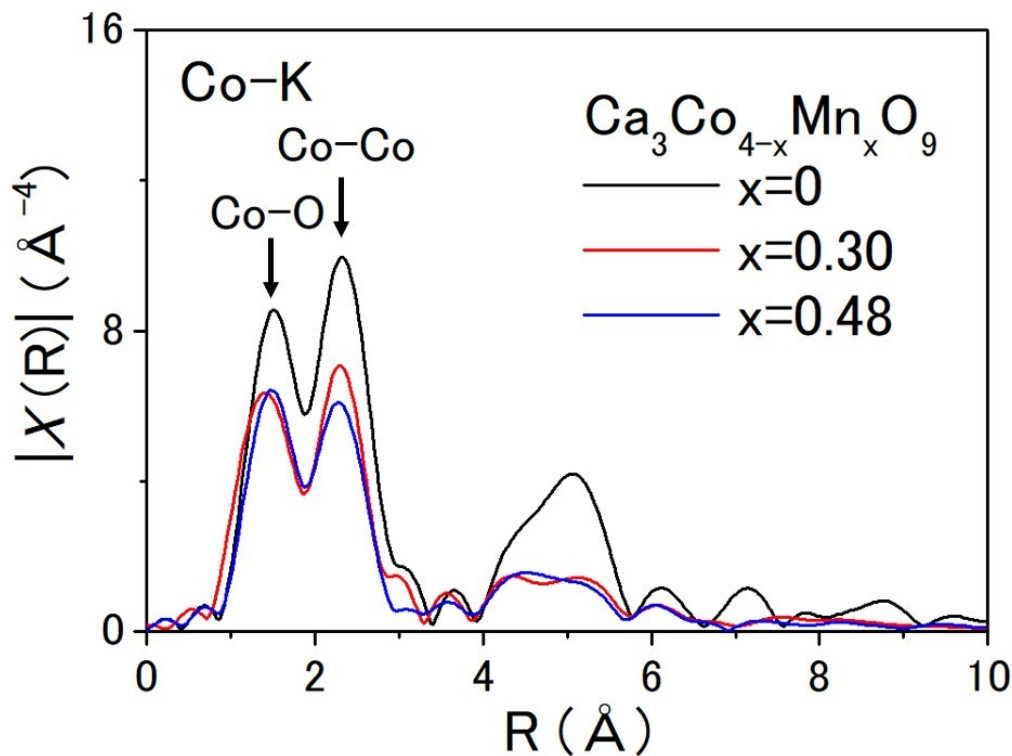

**Fig. S15.** Fourier transformed  $k^3$ -weighted Co K-edge EXAFS for  $\text{Ca}_3\text{Co}_{4-x}\text{Mn}_x\text{O}_9$  ( $x=0,$



0.30, 0.48) in the representation form of  $|X(\mathbf{R})|$ .

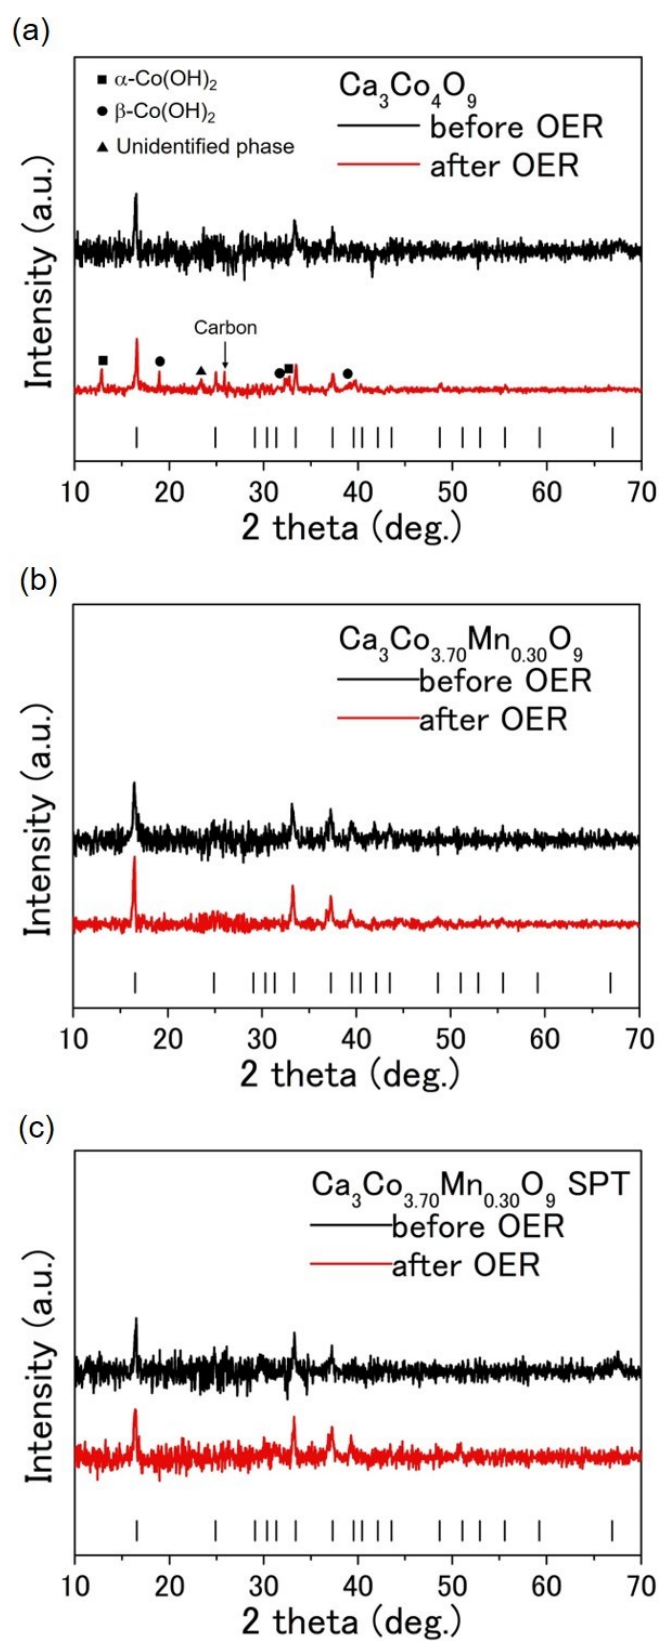

**Fig. S16.** X-ray diffraction profiles of  $\text{Ca}_3\text{Co}_4\text{O}_9$ ,  $\text{Ca}_3\text{Co}_{4-x}\text{Mn}_x\text{O}_9$  ( $x=0.30$ ), and  $\text{Ca}_3\text{Co}_{4-x}\text{Mn}_x\text{O}_9$  ( $x=0.30$  SPT) before and after the OER cycle stability test, along with the Bragg

position of  $\text{Ca}_3\text{Co}_4\text{O}_9$ . For  $\text{Ca}_3\text{Co}_4\text{O}_9$ , new diffraction peaks of  $\alpha\text{-Co(OH)}_2$  (JCPDS #46-0605) and  $\beta\text{-Co(OH)}_2$  (JCPDS #45-0036) were detectable after the OER test, suggesting the surface decomposition during the OER. The unidentified phase (its diffraction peak is denoted as triangle) is likely to be the product of the surface decomposition of  $\text{Ca}_3\text{Co}_4\text{O}_9$ .

(a)  $\text{Ca}_3\text{Co}_{4-x}\text{Mn}_x\text{O}_9$  ( $x=0.30$ )

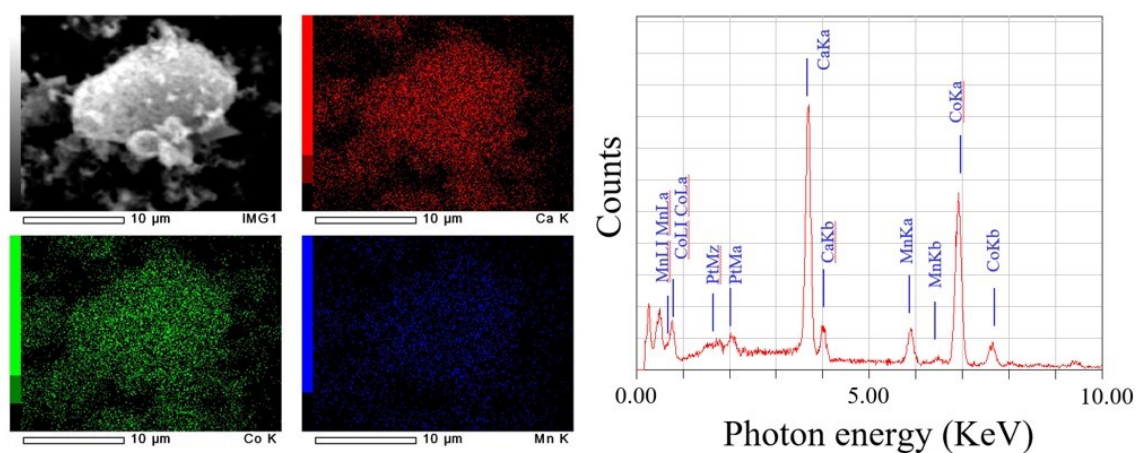

(b)  $\text{Ca}_3\text{Co}_{4-x}\text{Mn}_x\text{O}_9$  ( $x=0.30$  SPT)

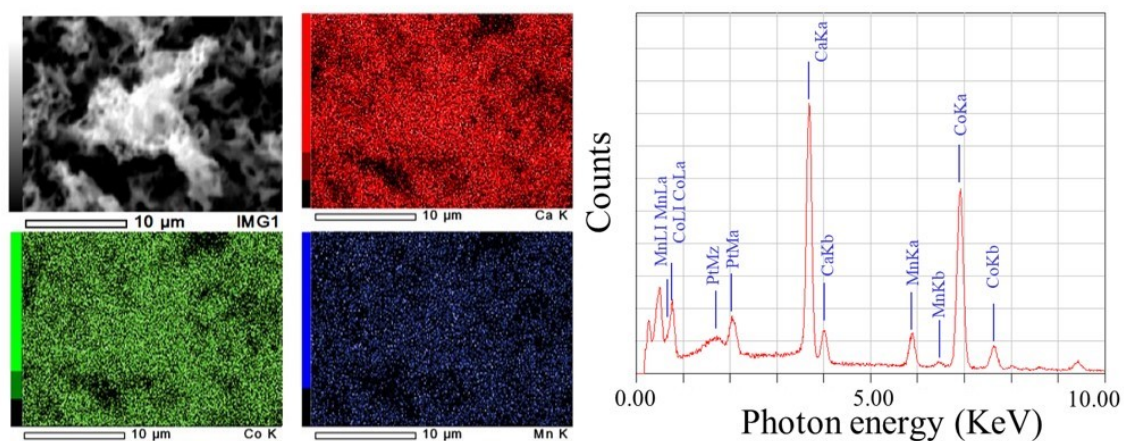

**Fig. S17.** SEM images, EDX elemental mapping, and EDX spectra of  $\text{Ca}_3\text{Co}_{4-x}\text{Mn}_x\text{O}_9$  ( $x=0.30$ ) before and after the solution plasma treatment.  $\text{Ca}_3\text{Co}_{4-x}\text{Mn}_x\text{O}_9$  ( $x=0.30$ ) after the solution plasma treatment is denoted as SPT.

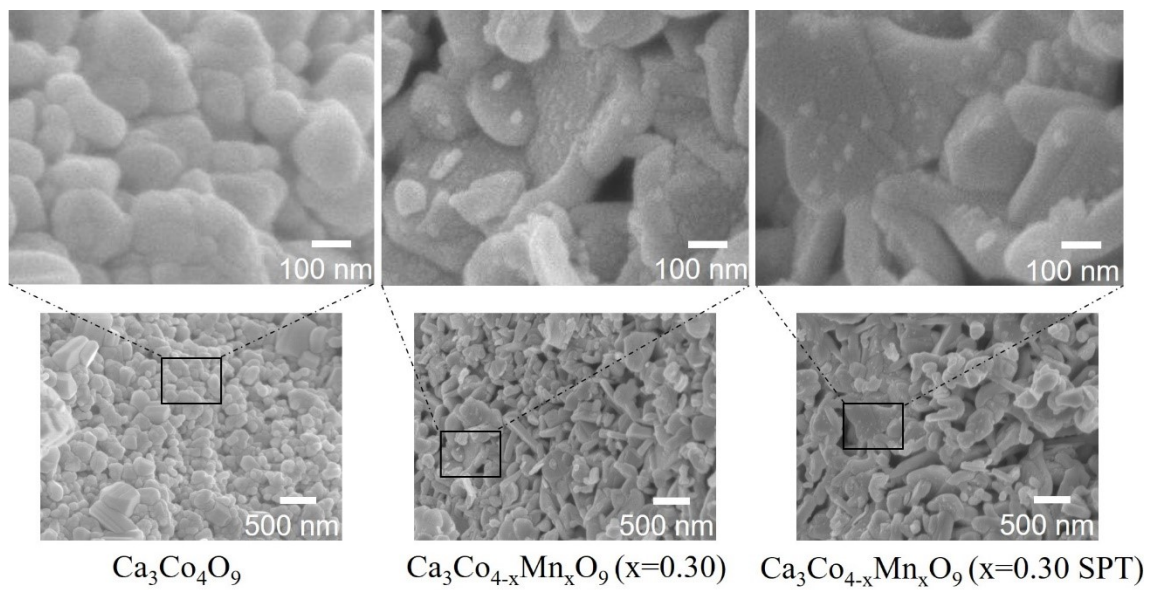

**Fig. S18.** FE-SEM images of  $\text{Ca}_3\text{Co}_{4-x}\text{Mn}_x\text{O}_9$  ( $x=0, 0.30, 0.30$  SPT) along with the magnified images.  $\text{Ca}_3\text{Co}_{4-x}\text{Mn}_x\text{O}_9$  ( $x=0.30$ ) after the solution plasma treatment is denoted as SPT.

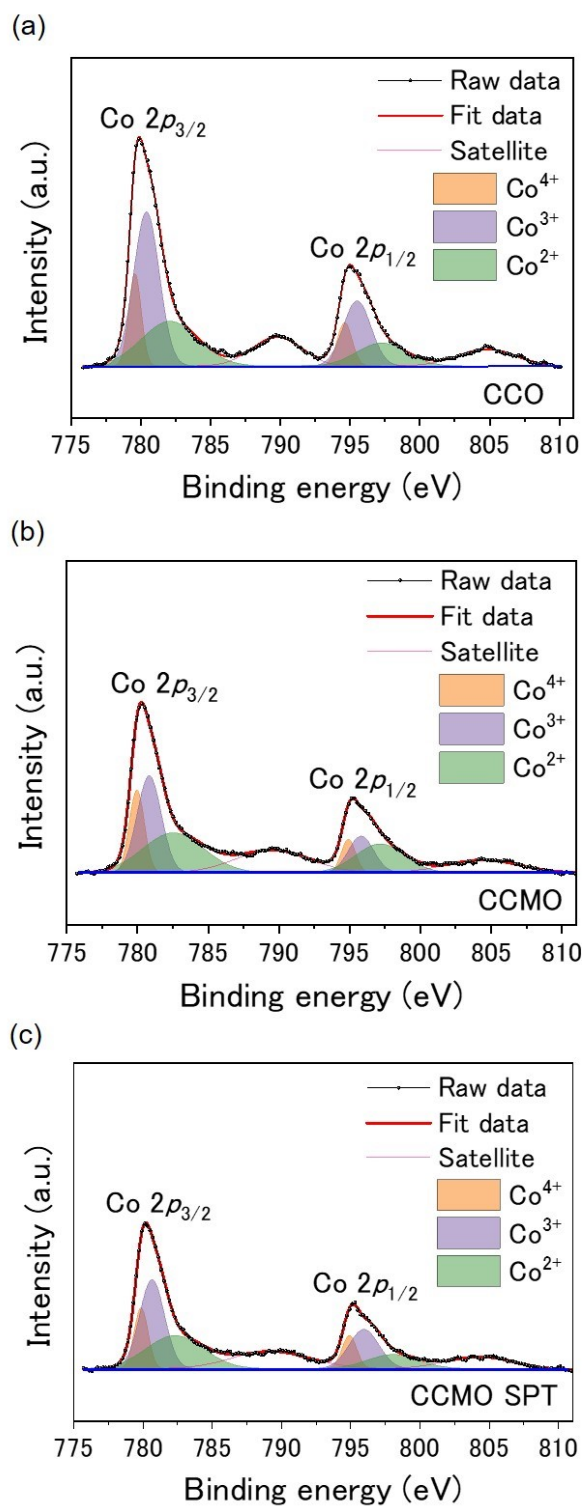

**Fig. S19.** Co 2p core-level spectra for (a)  $\text{Ca}_3\text{Co}_4\text{O}_9$ , (b)  $\text{Ca}_3\text{Co}_{4-x}\text{Mn}_x\text{O}_9$  ( $x=0.30$ ), and (c)  $\text{Ca}_3\text{Co}_{4-x}\text{Mn}_x\text{O}_9$  ( $x=0.30$  SPT).

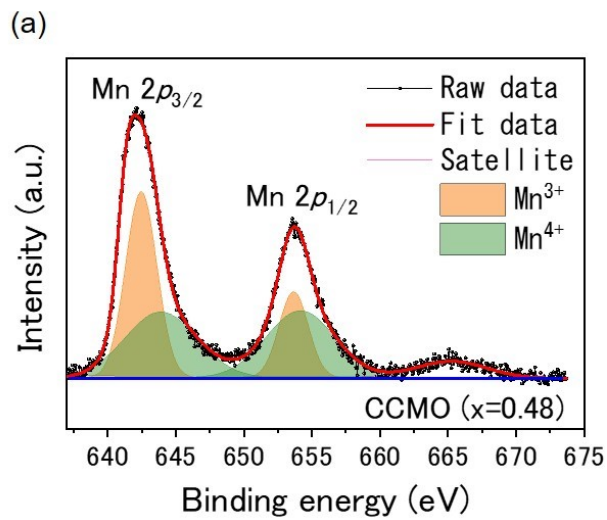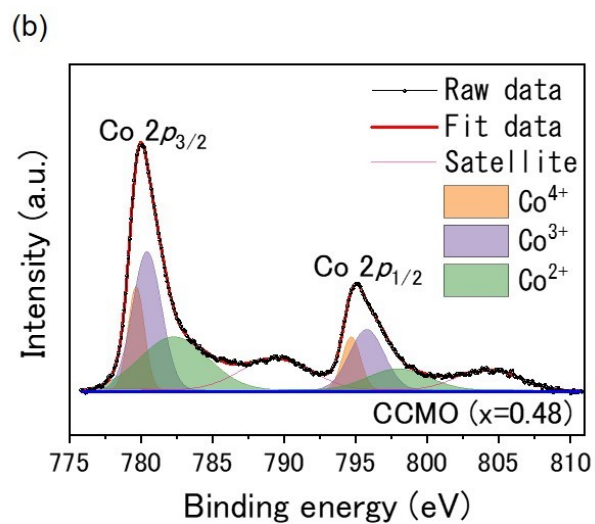

**Fig. S20.** (a) Mn  $2p$  core-level spectra for  $\text{Ca}_3\text{Co}_{4-x}\text{Mn}_x\text{O}_9$  ( $x=0.48$ ). (b) Co  $2p$  core-level spectra for  $\text{Ca}_3\text{Co}_{4-x}\text{Mn}_x\text{O}_9$  ( $x=0.48$ ).



(a)  $\text{Ca}_3\text{Co}_4\text{O}_9$  after OER

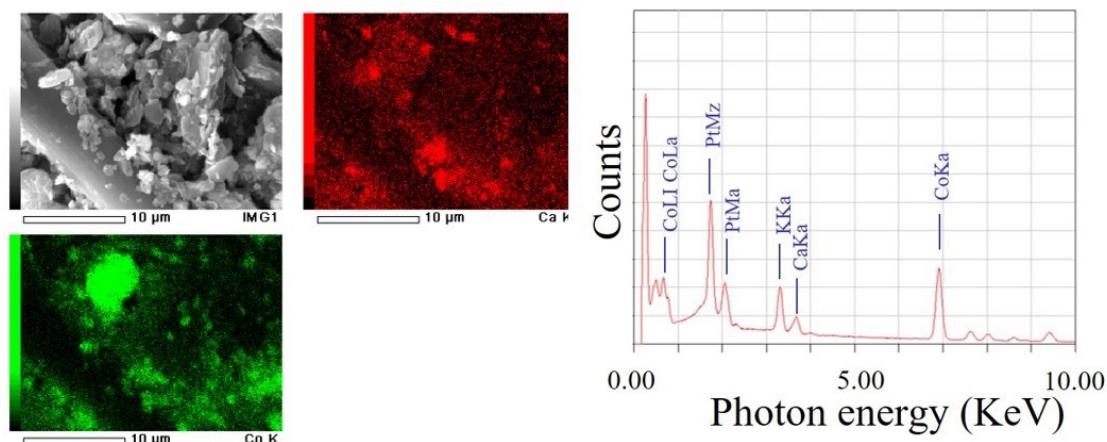

(b)  $\text{Ca}_3\text{Co}_{4-x}\text{Mn}_x\text{O}_9$  ( $x=0.30$ ) after OER

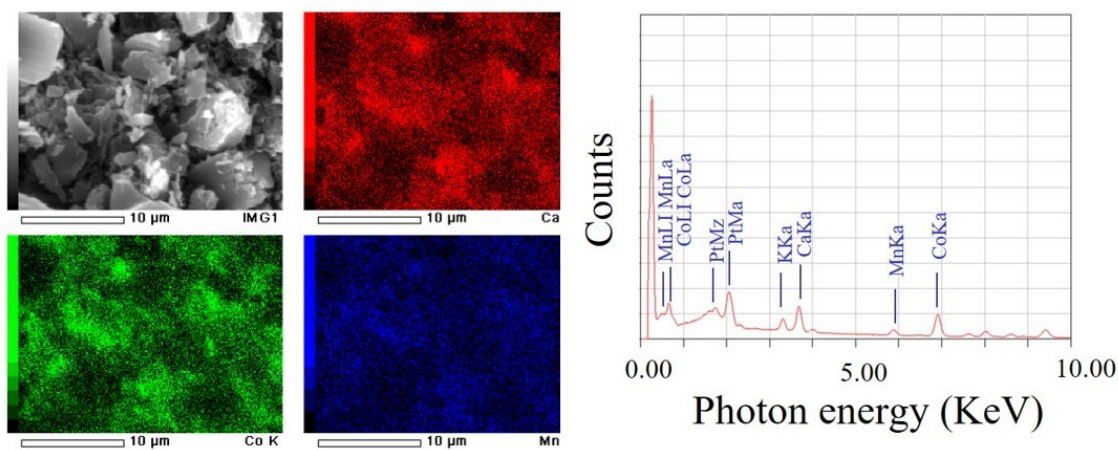

(c)  $\text{Ca}_3\text{Co}_{4-x}\text{Mn}_x\text{O}_9$  ( $x=0.30$  SPT) after OER

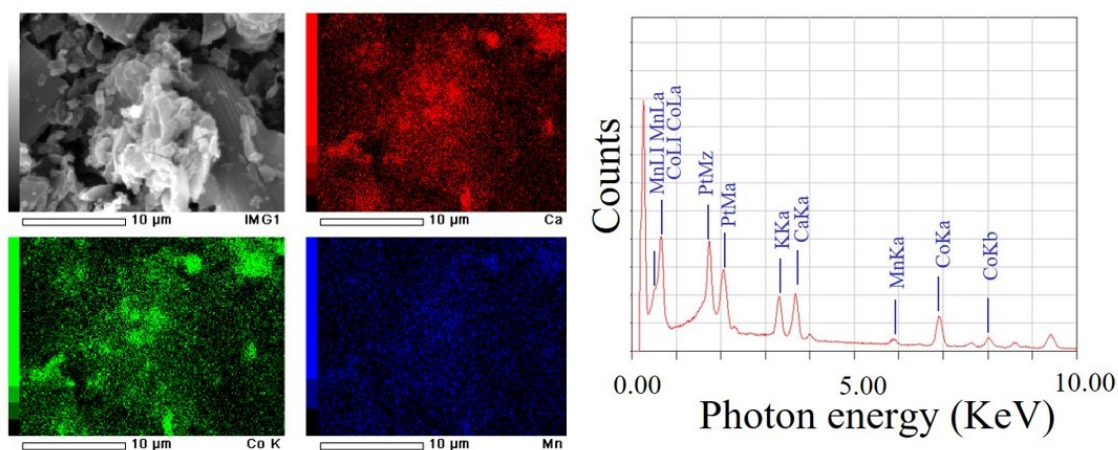

**Fig. S21.** SEM images, EDX elemental mapping, and EDX spectra of  $\text{Ca}_3\text{Co}_4\text{O}_9$ ,  $\text{Ca}_3\text{Co}_{4-x}\text{Mn}_x\text{O}_9$  ( $x=0.30$ ), and  $\text{Ca}_3\text{Co}_{4-x}\text{Mn}_x\text{O}_9$  ( $x=0.30$  SPT) after the OER cycle stability test. Carbon paper, acetylene black, and Nafion from the OER test is present in the SEM



image.

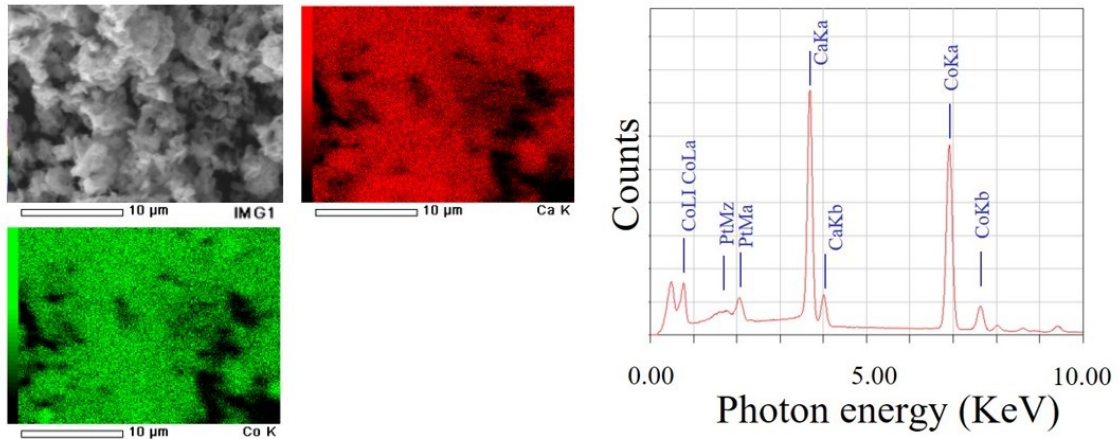

**Fig. S22.** SEM image, EDX elemental mapping, and EDX spectrum of  $\text{Ca}_3\text{Co}_4\text{O}_9$  before the OER cycle stability test.

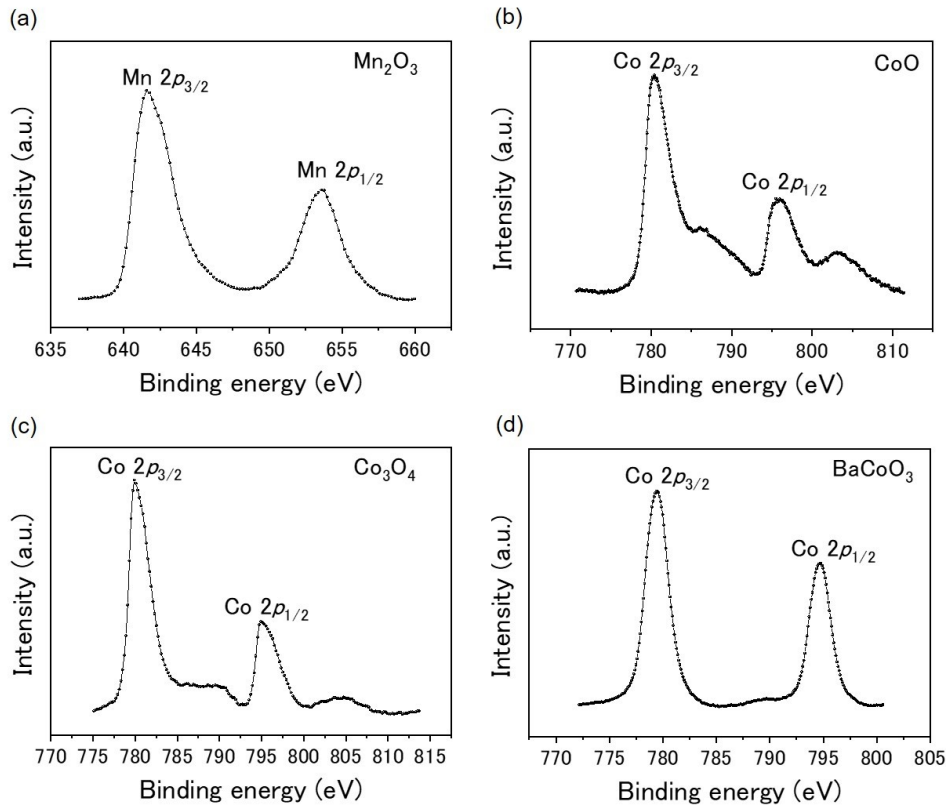

**Fig. S23.** Mn and Co  $2p$  core-level spectra of the reference samples. (a) Mn  $2p$  core-level spectra of  $\text{Mn}_2\text{O}_3$  (Mn  $2p_{3/2}$  peak: 641.7 eV and Mn  $2p_{1/2}$  peak: 653.5 eV). (b) Co  $2p$  core-level spectra of CoO (Co  $2p_{3/2}$  peak: 780.4 eV and Co  $2p_{1/2}$  peak: 796.0 eV). (c) Co  $2p$  core-level spectra of  $\text{Co}_3\text{O}_4$  (Co  $2p_{3/2}$  peak: 779.8 eV and Co  $2p_{1/2}$  peak: 794.9 eV). (d) Co  $2p$  core-level spectra of  $\text{BaCoO}_3$  (Co  $2p_{3/2}$  peak: 779.4 eV and Co  $2p_{1/2}$  peak: 794.7

eV).

**Table S1.** OER performance for  $\text{Ca}_3\text{Co}_{4-x}\text{Mn}_x\text{O}_9$  ( $x=0, 0.30, 0.48, 0.30$  SPT) in 0.1 M KOH aqueous solution.  $\text{Co}_3\text{O}_4$  nanoparticle is shown as a standard of a highly active OER catalyst. The overpotential ( $\eta$ ) at  $0.5 \text{ mA/cm}^2$  was determined from the onset potential ( $E_{\text{onset}}$ ) by  $\eta = E_{\text{onset}} - 1.23 \text{ V}$ . The turnover frequency (TOF) was calculated by  $\text{TOF} = j/4Fn$ , where  $j$  is the OER current at 1.66 V vs. RHE,  $F$  is the Faraday constant, and  $n$  is the number of moles of the Co atom on the working electrode.

| Materials               | Current density ( $\text{mA/cm}^2$ )<br>1st @ 1.66 V vs. RHE | Current density ( $\text{mA/cm}^2$ )<br>100th @ 1.66 V vs. RHE |
|-------------------------|--------------------------------------------------------------|----------------------------------------------------------------|
| $\text{Co}_3\text{O}_4$ | 1.00                                                         | 2.83                                                           |
| CCO                     | 3.06                                                         | 2.31                                                           |
| CCMO( $x=0.30$ )        | 10.76                                                        | 11.84                                                          |
| CCMO( $x=0.48$ )        | 1.32                                                         | 2.22                                                           |
| CCMO( $x=0.30$ ) SPT    | 32.47                                                        | 11.55                                                          |

| Materials               | Overpotential $\eta$ (V) 1st | overpotential $\eta$ (V) 100th |
|-------------------------|------------------------------|--------------------------------|
| $\text{Co}_3\text{O}_4$ | 0.40                         | 0.37                           |
| CCO                     | 0.10                         | 0.26                           |
| CCMO( $x=0.30$ )        | 0.37                         | 0.39                           |
| CCMO( $x=0.48$ )        | 0.40                         | 0.39                           |
| CCMO( $x=0.30$ ) SPT    | 0.34                         | 0.35                           |

| Materials               | TOF ( $\text{s}^{-1}$ ) 1st | TOF ( $\text{s}^{-1}$ ) 100th |
|-------------------------|-----------------------------|-------------------------------|
| $\text{Co}_3\text{O}_4$ | $8.18 \times 10^{-4}$       | $2.31 \times 10^{-3}$         |
| CCO                     | $3.89 \times 10^{-3}$       | $2.94 \times 10^{-3}$         |
| CCMO( $x=0.30$ )        | $1.48 \times 10^{-2}$       | $1.62 \times 10^{-2}$         |
| CCMO( $x=0.48$ )        | $1.90 \times 10^{-3}$       | $3.20 \times 10^{-3}$         |

|                  |                       |                       |
|------------------|-----------------------|-----------------------|
| CCMO(x=0.30) SPT | $4.45 \times 10^{-2}$ | $1.58 \times 10^{-2}$ |
|------------------|-----------------------|-----------------------|

**Table S2.** The resistance elements of the equivalent circuit for  $\text{Ca}_3\text{Co}_4\text{O}_9$  and the Mn-doped  $\text{Ca}_3\text{Co}_{3.70}\text{Mn}_{0.30}\text{O}_9$ . These results were obtained by fitting the electrochemical impedance spectra (EIS) of  $\text{Ca}_3\text{Co}_4\text{O}_9$  and  $\text{Ca}_3\text{Co}_{3.70}\text{Mn}_{0.30}\text{O}_9$  with the equivalent circuit in Fig. 3g at 0.7 V vs. Hg/HgO.  $R_s$ ,  $R_t$ , and  $R_{ct}$  denote the solution resistance, film resistance, charge transfer resistance.

|                       | CCO | CCMO(x=0.30) | CCMO(x=0.30) SPT |
|-----------------------|-----|--------------|------------------|
| $R_s$ ( $\Omega$ )    | 43  | 43           | 43               |
| $R_t$ ( $\Omega$ )    | 80  | 80           | 80               |
| $R_{ct}$ ( $\Omega$ ) | 450 | 292          | 16               |

**Table S3.** ORR performance for  $\text{Ca}_3\text{Co}_{4-x}\text{Mn}_x\text{O}_9$  (x=0, 0.30, 0.48, 0.30 SPT) in 0.1 M KOH aqueous solution.  $\text{Mn}_2\text{O}_3$  and Pt/C (20 wt.% load, Sigma-Aldrich) are shown as standards of highly active ORR catalysts. The overpotential ( $\eta$ ) at 0.5 mA/cm<sup>2</sup> was determined from the onset potential ( $E_{onset}$ ) by  $\eta = 1.23 \text{ V} - E_{onset}$ .

| Materials               | Current density (mA/cm <sup>2</sup> )<br>@ 0.30 V vs. RHE | Overpotential $\eta$ (V) |
|-------------------------|-----------------------------------------------------------|--------------------------|
| $\text{Mn}_2\text{O}_3$ | 2.39                                                      | 0.50                     |
| Pt/C                    | 4.10                                                      | 0.38                     |
| CCO                     | 1.38                                                      | 0.66                     |
| CCMO(x=0.30)            | 1.52                                                      | 0.51                     |
| CCMO(x=0.48)            | 1.28                                                      | 0.62                     |
| CCMO(x=0.30) SPT        | 1.56                                                      | 0.54                     |

**Table S4.** Mn/Co ratio of  $\text{Ca}_3\text{Co}_{4-x}\text{Mn}_x\text{O}_9$  ( $x=0.30$ ) before and after the solution plasma treatment. The Mn/Co ratio of  $\text{Ca}_3\text{Co}_{4-x}\text{Mn}_x\text{O}_9$  ( $x=0.48$ ) is also shown. The Mn/Co ratio was determined by X-ray photoemission spectroscopy (XPS). Integrated peak areas of the Mn and Co  $2p$  core-level spectra (Fig. 6, Fig. S19, and Fig. S20) were used for calculating the Mn/Co ratio. The Mn/Co ratio determined by the Mn content  $x$  that follows the Vegard's law (Fig. 1b) is shown for comparison. Furthermore, we show the Mn/Co ratio determined by the SEM/EDX analysis (Fig. S2, Fig. S17, Fig. S21, and Fig. S22).

| Materials            | Mn/Co ratio<br>from XPS | Mn/Co ratio<br>from Vegard's law | Mn/Co ratio<br>from EDX |
|----------------------|-------------------------|----------------------------------|-------------------------|
| CCMO( $x=0.30$ )     | 0.38                    | 0.08                             | 0.15                    |
| CCMO( $x=0.30$ ) SPT | 0.32                    | 0.08                             | 0.14                    |
| CCMO( $x=0.48$ )     | 0.31                    | 0.14                             | 0.19                    |

**Table S5.**  $\text{Mn}^{3+}/\text{Mn}^{4+}$  ratio of  $\text{Ca}_3\text{Co}_{4-x}\text{Mn}_x\text{O}_9$  ( $x=0.30$ ) before and after the solution plasma treatment. The  $\text{Mn}^{3+}/\text{Mn}^{4+}$  ratio of  $\text{Ca}_3\text{Co}_{4-x}\text{Mn}_x\text{O}_9$  ( $x=0.48$ ) is also shown. The  $\text{Mn}^{3+}/\text{Mn}^{4+}$  ratio was determined by X-ray photoemission spectroscopy (XPS). Integrated peak areas of the Mn  $2p$  core-level spectra (Fig. 6) were used for calculating the  $\text{Mn}^{3+}/\text{Mn}^{4+}$  ratio. The  $\text{Mn}^{3+}/\text{Mn}^{4+}$  ratio determined by the Mn K-edge X-ray absorption near-edge structure (XANES) spectra (Fig. 2, Fig. S3, and Fig. S14) is shown for comparison.

| Materials            | $\text{Mn}^{3+}/\text{Mn}^{4+}$ ratio<br>from XPS | $\text{Mn}^{3+}/\text{Mn}^{4+}$ ratio<br>from XANES |
|----------------------|---------------------------------------------------|-----------------------------------------------------|
| CCMO( $x=0.30$ )     | 1.32                                              | 0.23                                                |
| CCMO( $x=0.30$ ) SPT | 1.65                                              | -                                                   |
| CCMO( $x=0.48$ )     | 0.81                                              | 0.28                                                |

**Table S6.** Mn/Co and (Mn+Co)/Ca ratio of  $\text{Ca}_3\text{Co}_4\text{O}_9$ ,  $\text{Ca}_3\text{Co}_{4-x}\text{Mn}_x\text{O}_9$  ( $x=0.30$ ), and  $\text{Ca}_3\text{Co}_{4-x}\text{Mn}_x\text{O}_9$  ( $x=0.30$  SPT) before and after the OER cycle stability test. The elemental ratio was determined by the SEM/EDX analysis (Fig. S2, Fig. S17, Fig. S21, and Fig. S22).

| Materials                         | Mn/Co ratio<br>from EDX | (Mn+Co)/Ca ratio<br>from EDX |
|-----------------------------------|-------------------------|------------------------------|
| CCO                               | -                       | 1.3                          |
| CCO after OER                     | -                       | 8.1                          |
| CCMO( $x=0.30$ )                  | 0.15                    | 1.3                          |
| CCMO( $x=0.30$ )<br>after OER     | 0.17                    | 1.8                          |
| CCMO( $x=0.30$ ) SPT              | 0.14                    | 1.3                          |
| CCMO( $x=0.30$ ) SPT<br>after OER | 0.13                    | 1.3                          |
